# Supplementary material for: Health effects of holistic housing renovation in a disadvantaged neighbourhood in the Netherlands: a qualitative exploration among residents and professionals
Source: Springer Nature journal article supplement (doi:10.1186/s12889-024-18500-2), 2024-04-16

Simplified visual display of the mechanisms from our realist review

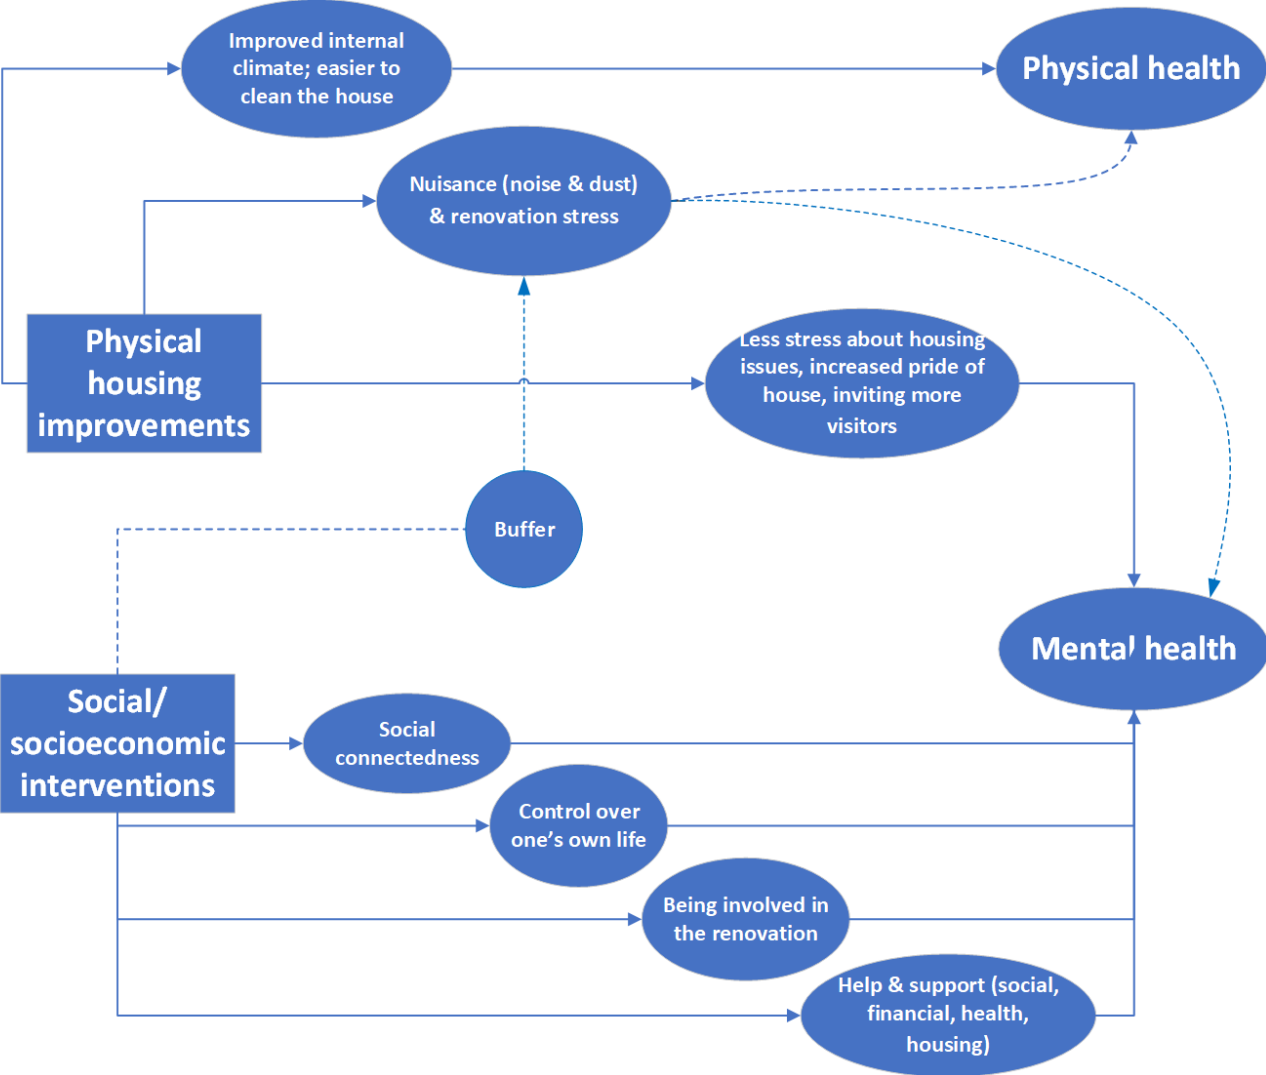

Supplement: MOESM2 [file 26985432]
